# Supplementary material for: Mechanical, magnetic and electronic properties of 2D MSX (M = Ti, V, Co and Ni, X = Br and I)
Source: Royal Society of Chemistry journal article supplement (doi:10.1039/d3cp01842c), 2023-01-01
Supplement: d3cp01842c1.pdf [file d3cp01842c1.pdf]

**Supplemental Material for**  
**Mechanical, Magnetic and Electronic Properties of 2D MSX (M = Ti,**  
**V, Co and Ni, X = Br and I)**

Yutong Li<sup>1</sup>, Bowen Li<sup>2</sup>, Haoyun Bai<sup>2</sup>, Zhichao Yu<sup>2</sup>, Chi Tat Kwok<sup>1,2\*</sup>, Hui Pan<sup>2,3\*</sup>

<sup>1</sup> Department of Electromechanical Engineering, Faculty of Science and Technology,  
University of Macau, Macao SAR, China

<sup>2</sup> Institute of Applied Physics and Materials Engineering, University of Macau, Macao SAR,  
China

<sup>3</sup> Department of Physics and Chemistry, Faculty of Science and Technology, University of  
Macao, Macao SAR, China

\*Corresponding authors:

C. T. Kwok: [fstctk@um.edu.mo](mailto:fstctk@um.edu.mo) (email)

H. Pan: [huipan@um.edu.mo](mailto:huipan@um.edu.mo) (email)

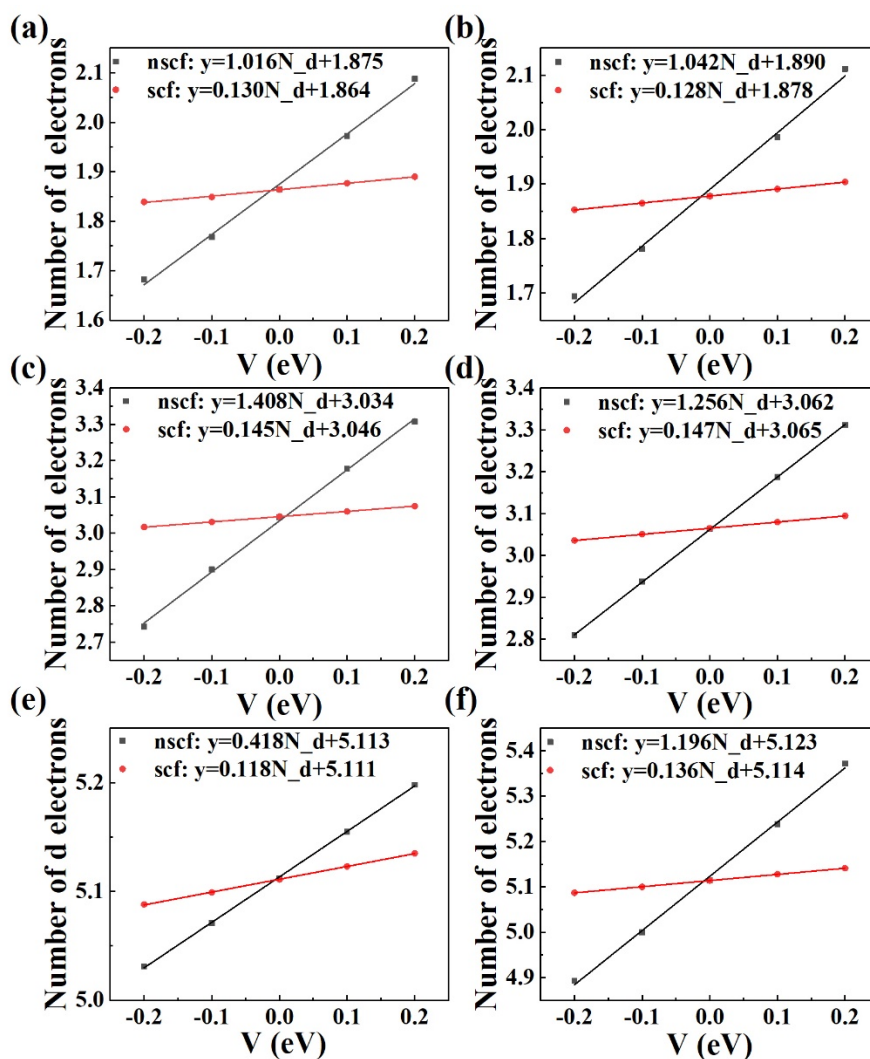

Figure S1 Linear fitting calculations for determining  $U_{\text{eff}}$ , illustrated as the relationship between the number of *d*-electrons on transition metals and the additional potential (V) for (a) TiSBr,

(b) TiSI, (c) VSBr, (d) VSI, (e) MnSBr, and (f) MnSI.

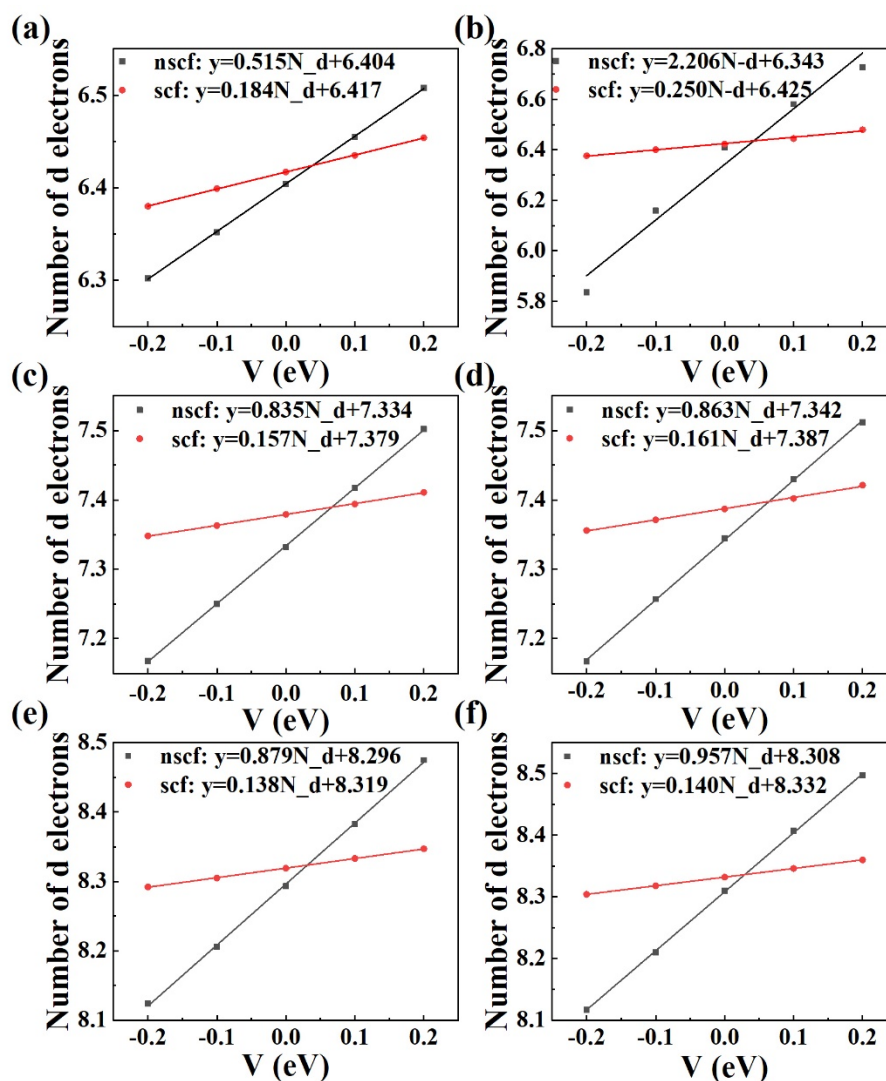

Figure S2 Linear fitting calculations for determining  $U_{\text{eff}}$ , illustrated as the relationship between the number of *d*-electrons on transition metals and the additional potential (*V*) for (a) FeSBr, (b) FeSI, (c) CoSBr, (d) CoSI, (e) NiSBr, and (f) NiSI.

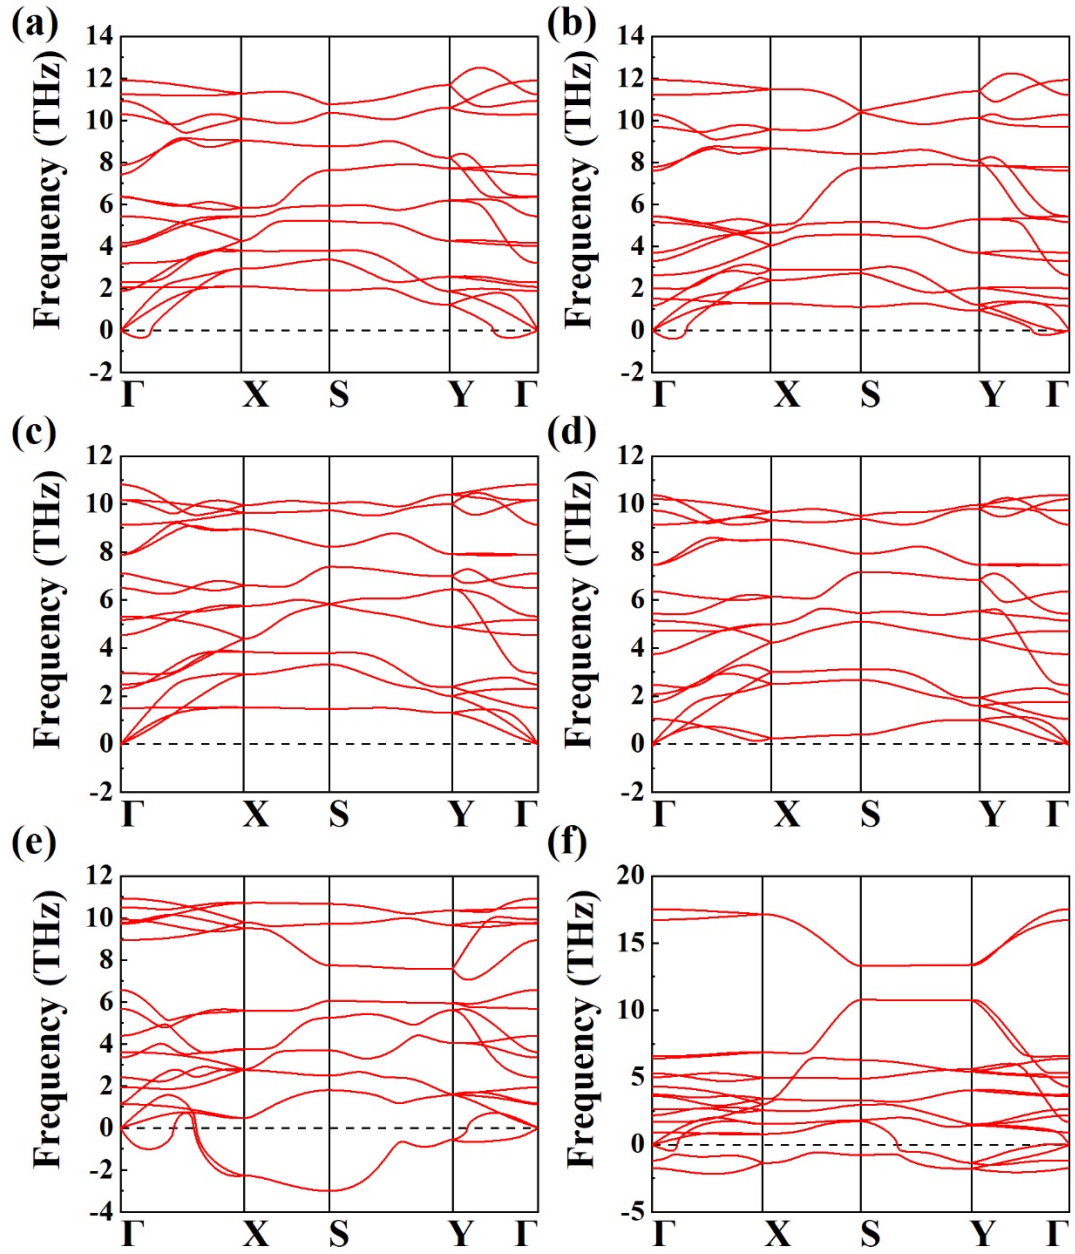

Figure S3 Phonon dispersions for (a) TiSBr, (b) TiSI, (c) VSBr, (d) VSI, (e) MnSBr, and (f) MnSI.

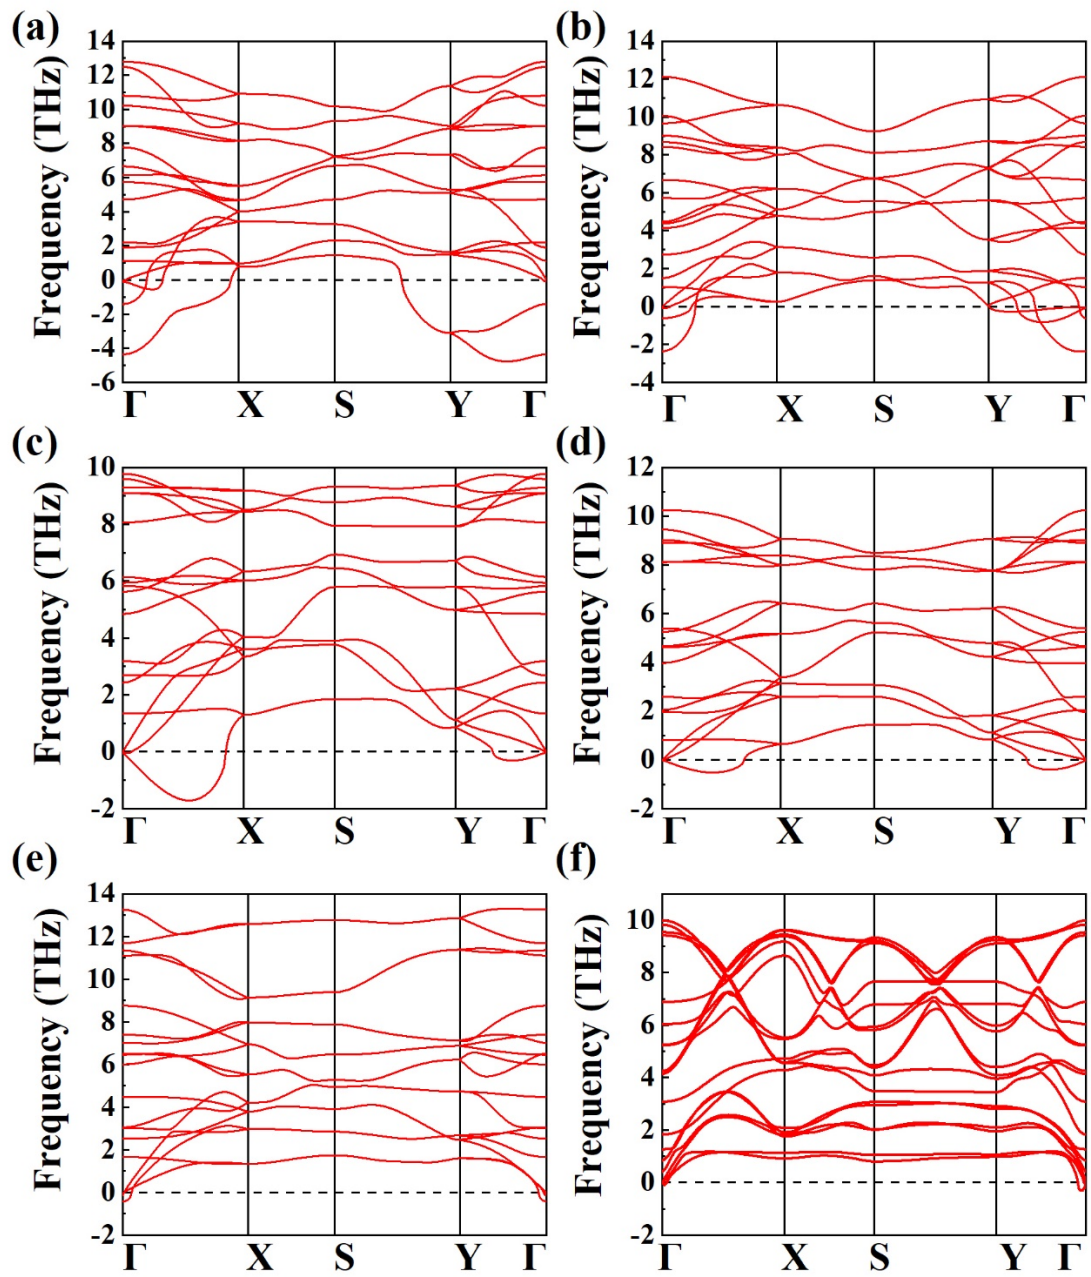

Figure S4 Phonon dispersions for (a) FeSBr, and (b) FeSI, (c) CoSBr, (d) CoSI, (e) NiSBr, and (f) NiSI.

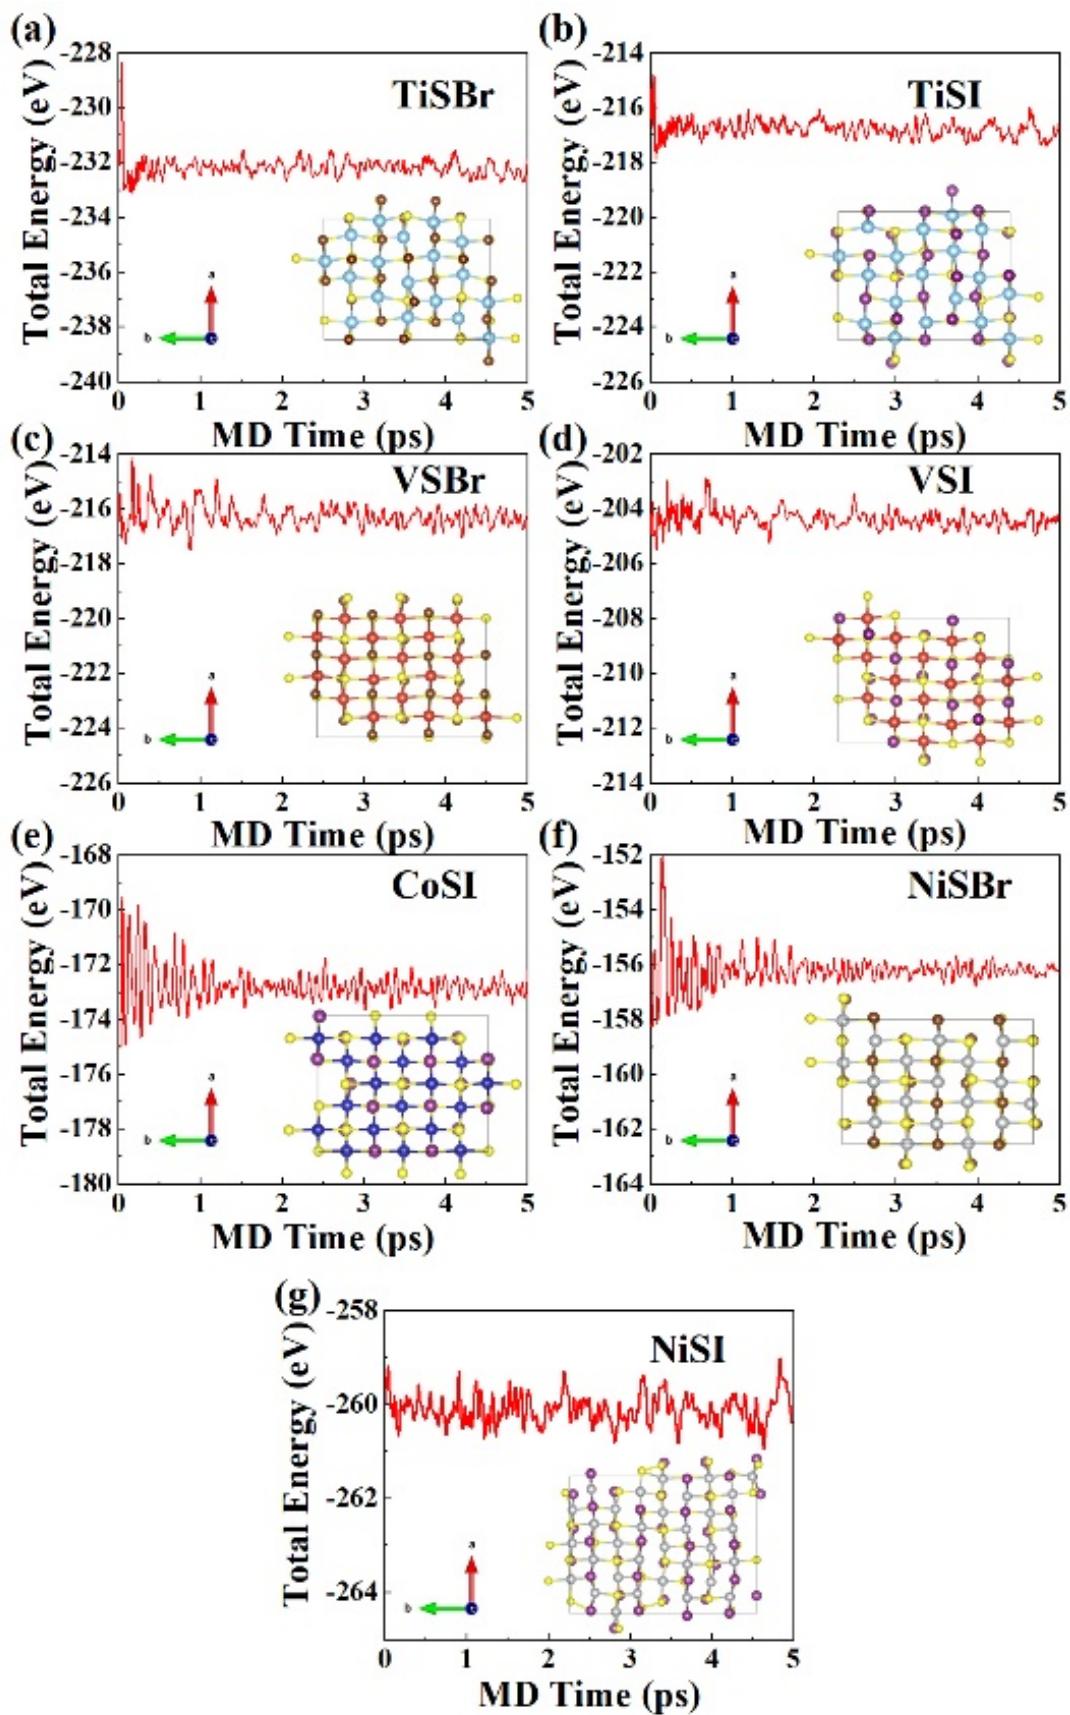

Figure S5 The AIMD simulations of (a) TiSBr, (b) TiSI, (c) VSBr, (d) VSI, (e) CoSI, (f) NiSBr, and (g) NiSI, respectively. The insets are the top views of the structure after the test.

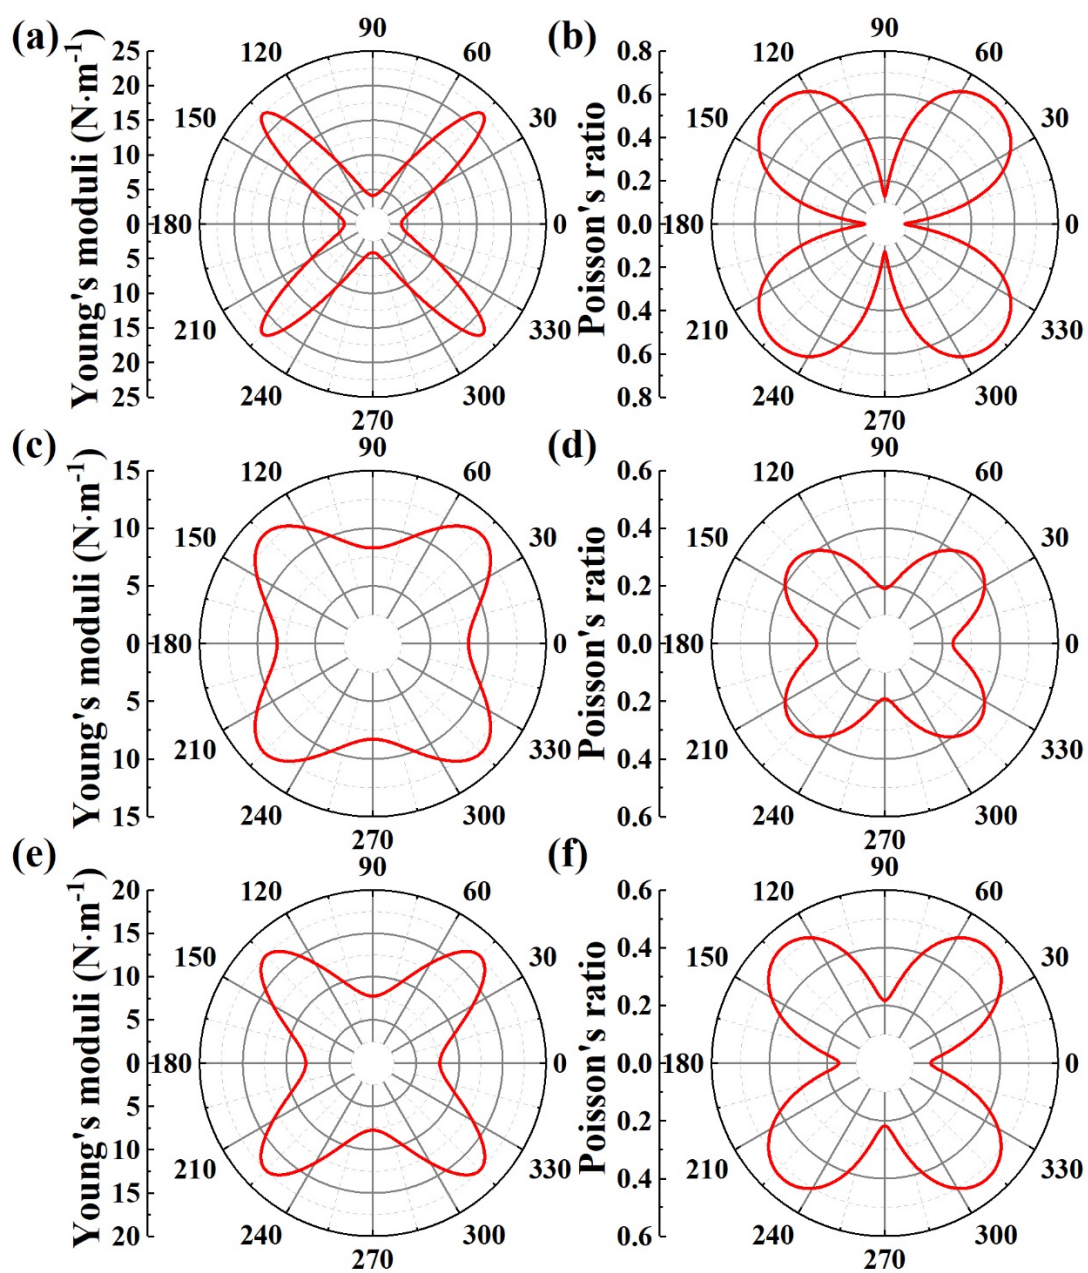

Figure S6 (a) Young's moduli and (b) Poisson's ratio of TiSI, (c) Young's moduli and (d) Poisson's ratio of VSBBr, and (e) Young's moduli and (f) Poisson's ratio of VSI.

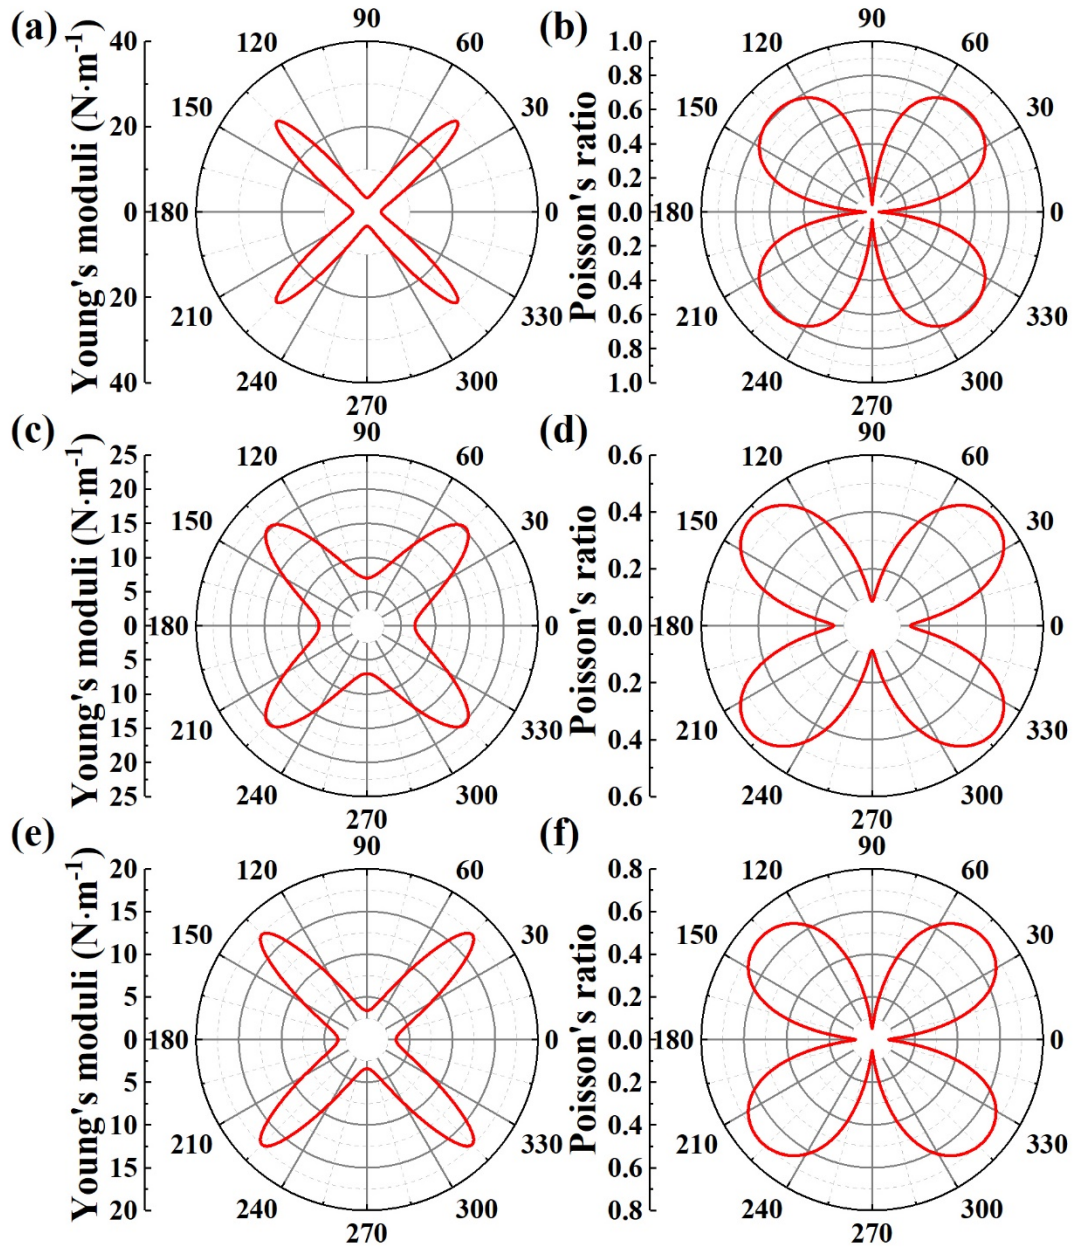

Figure S7 (a) Young's moduli and (b) Poisson's ratio of CoSI, (c) Young's moduli and (d) Poisson's ratio of NiSBr, and (e) Young's moduli and (f) Poisson's ratio of NiSI.

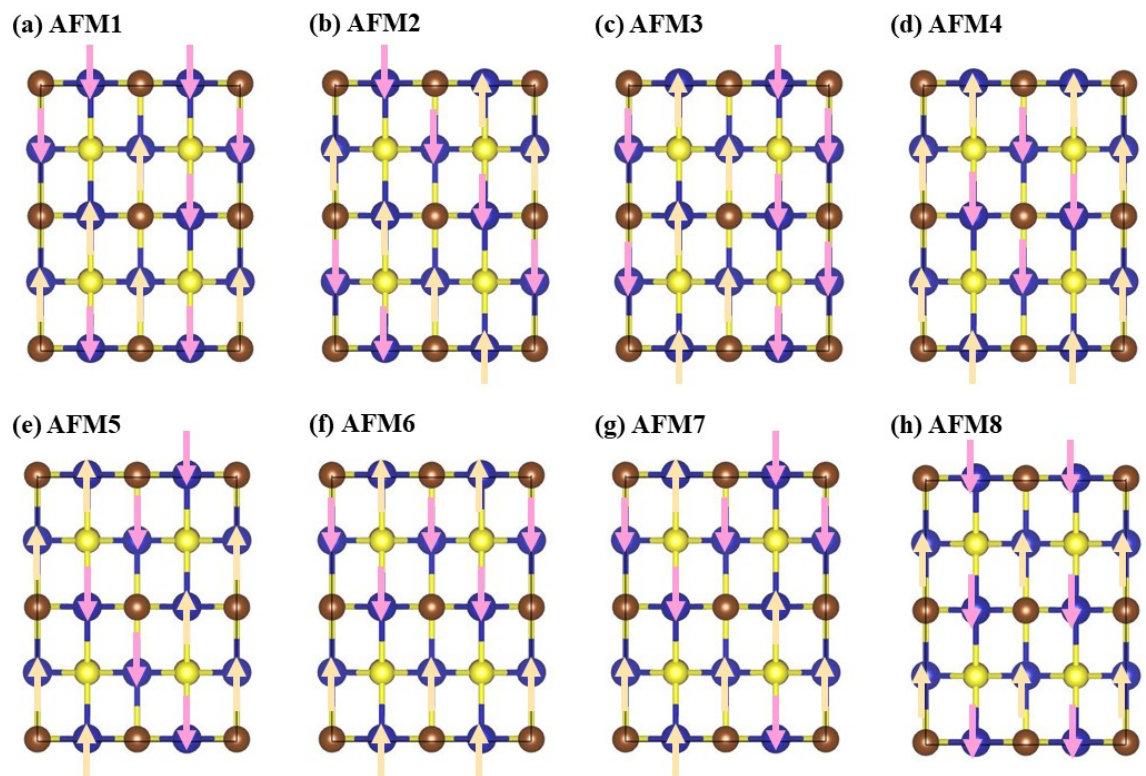

Figure S8 Top views of AFM states in a  $2 \times 2 \times 1$  supercell. Blue, yellow, and brown spheres denote M, S, and X atoms, respectively. White and pink arrows represent the spin-up and spin-down moments, respectively.



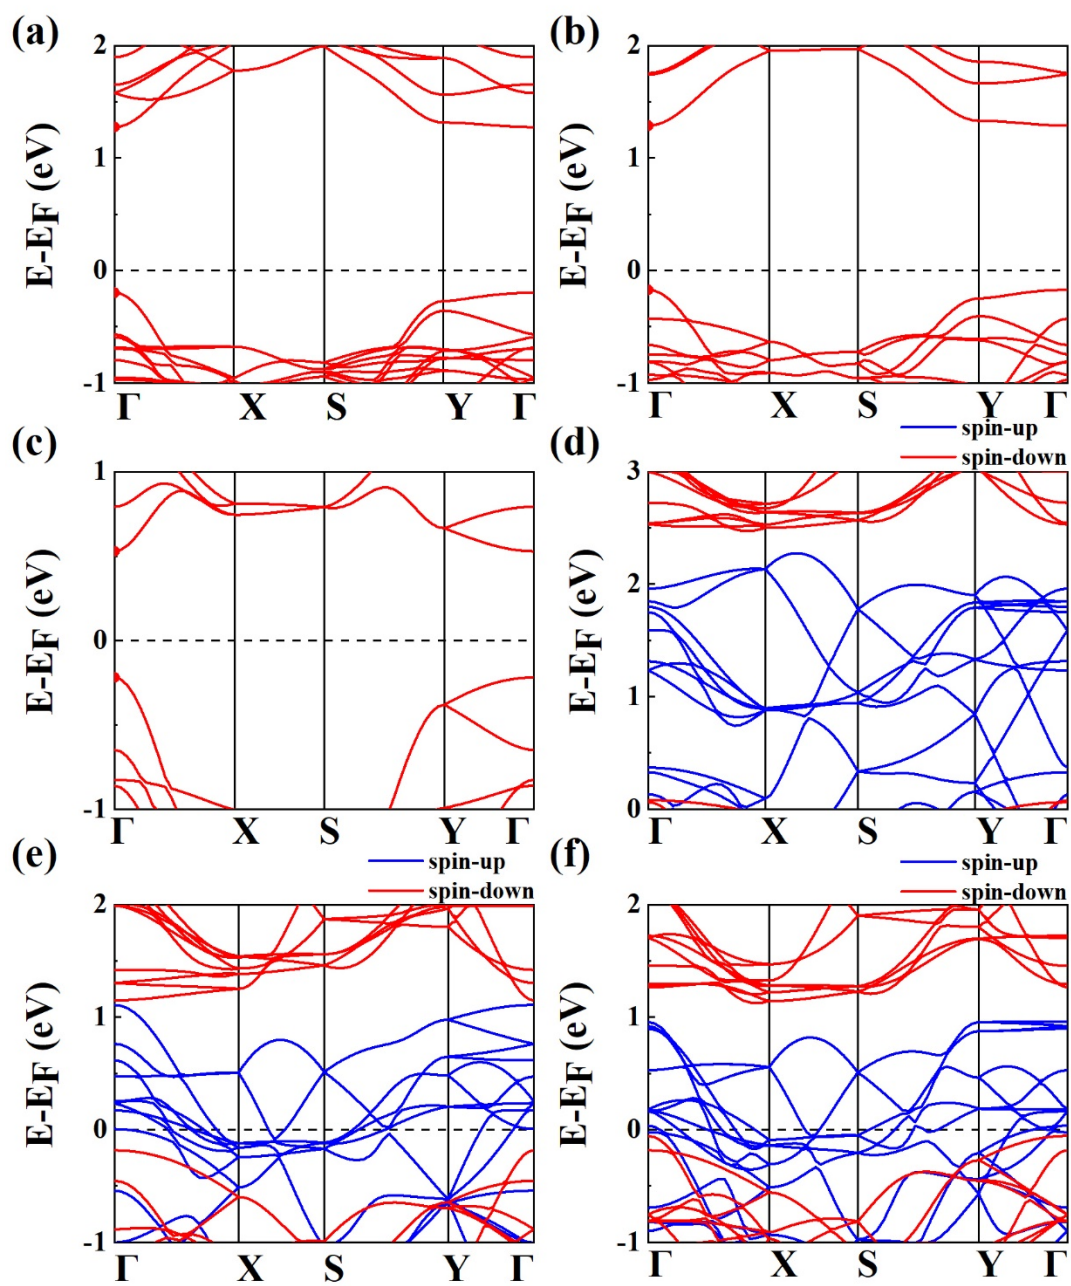

Figure S9 Band structures of (a) TiSI, (b) VSBBr, (c) VSI, (d) CoSI, (e) NiSBr, and (f) NiSI.

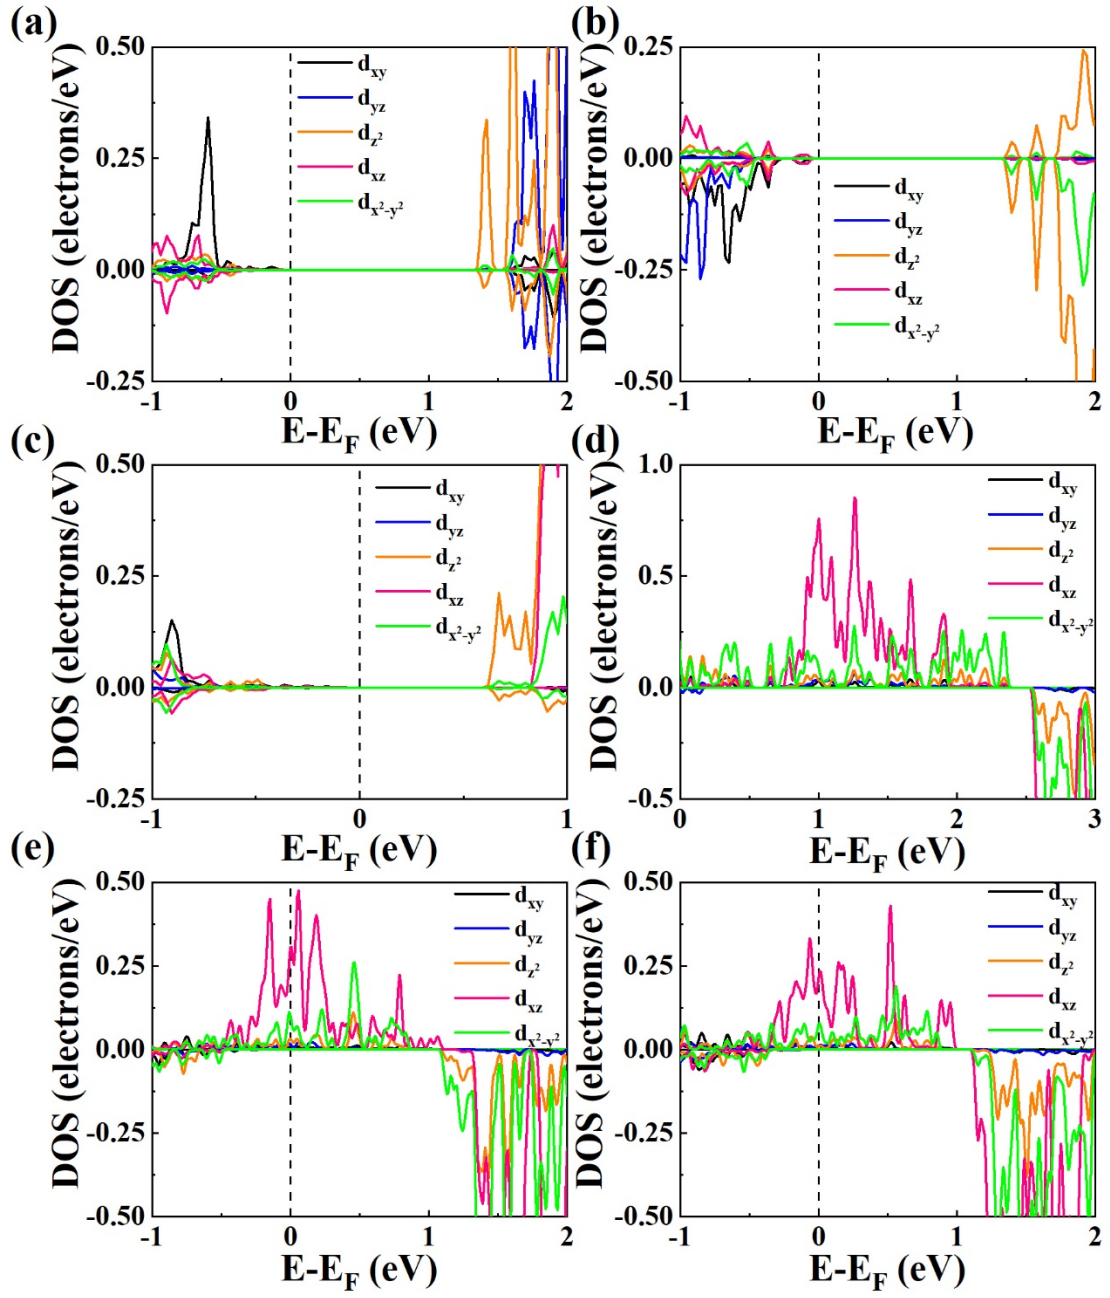

Figure S10 PDOSs of the  $d$  electrons of M atoms of (a) TiSI, (b) VSBr, (c) VSI, (d) CoSI, (e) NiSBr, and (f) NiSI.

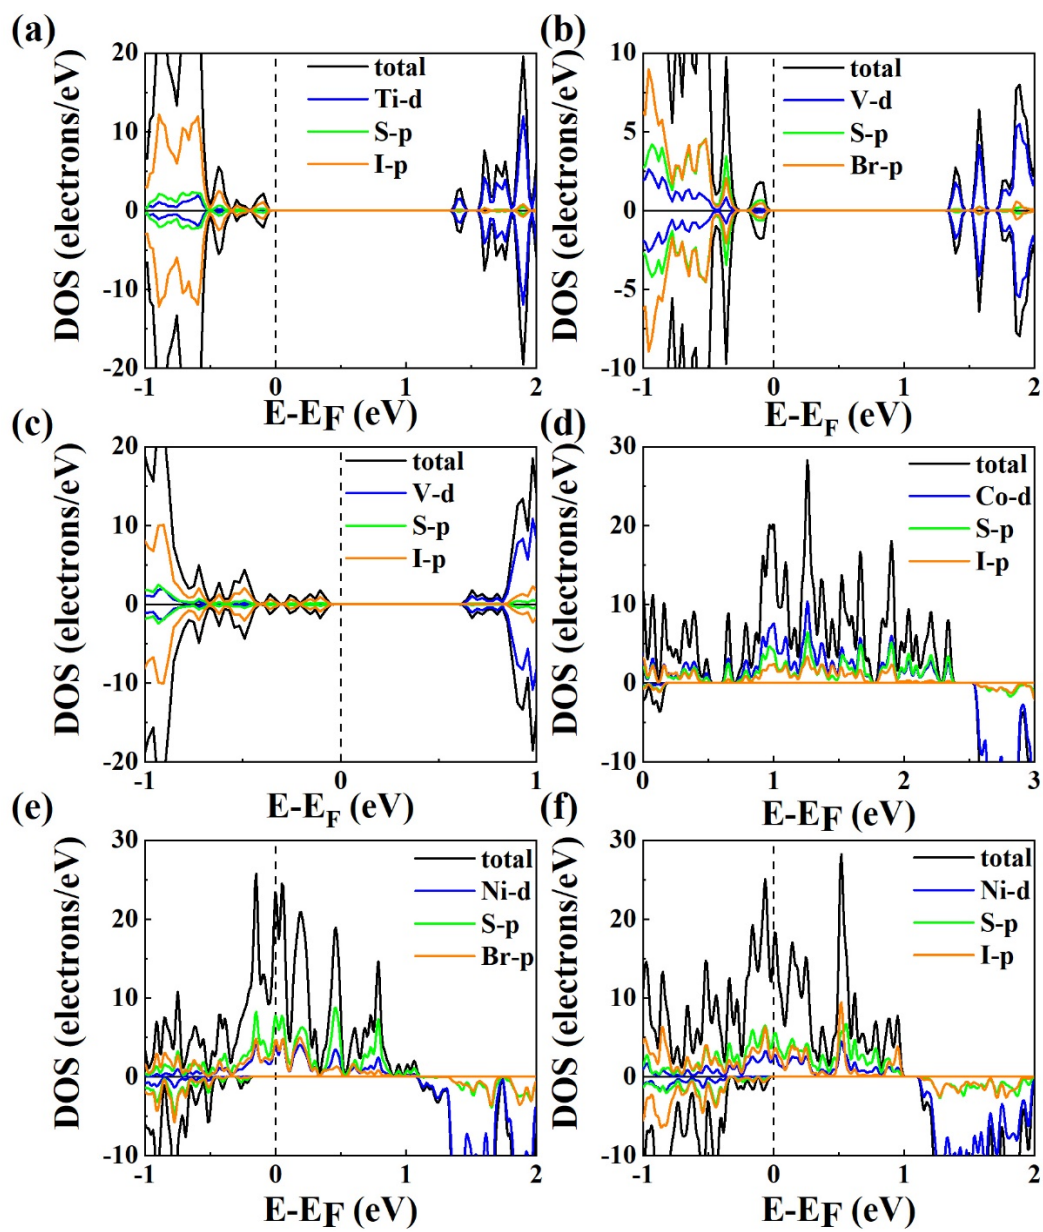

Figure S11 PDOSs of (a) TiSI, (b) VSBr, (c) VSI, (d) CoSI, (e) NiSBr, and (f) NiSI.

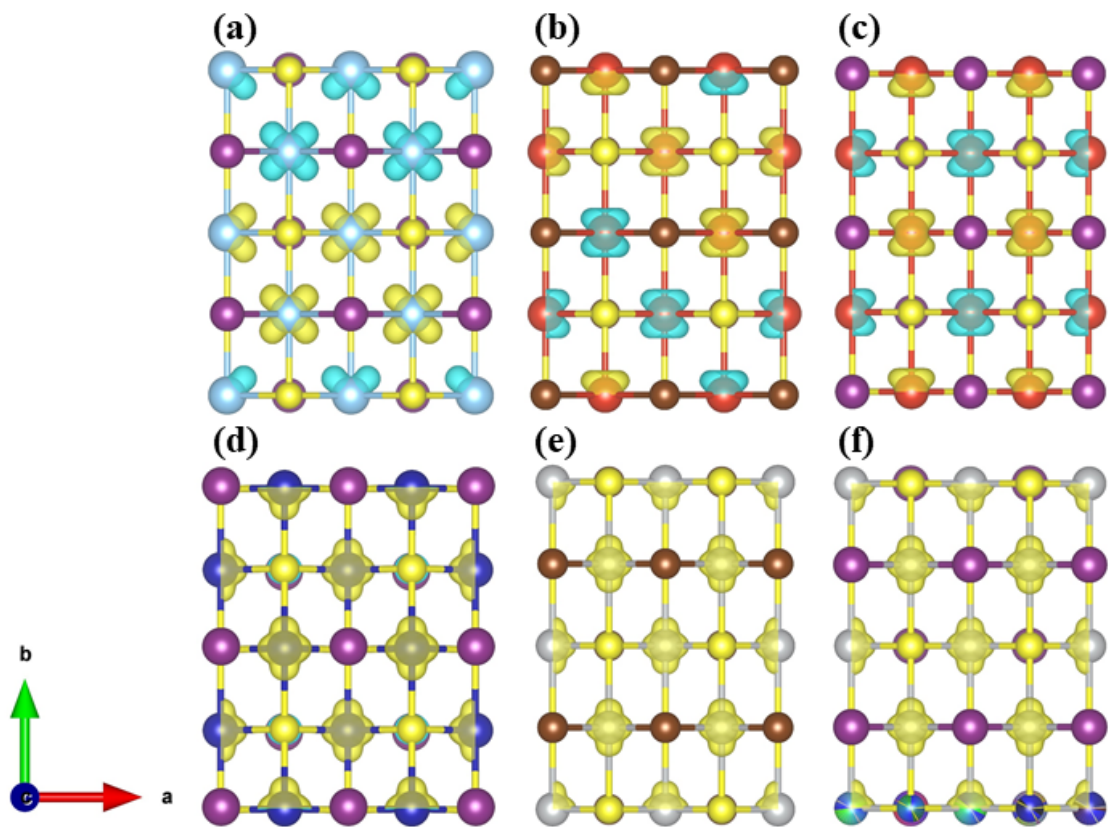

Figure S12 Top views of spin densities in (a) TiSI, (b) VSBr, (c) VSI, (d) CoSI, (e) NiSBr, and (f) NiSI, respectively. The spin-up density is shown in yellow and the spin-down density is shown in blue, respectively.

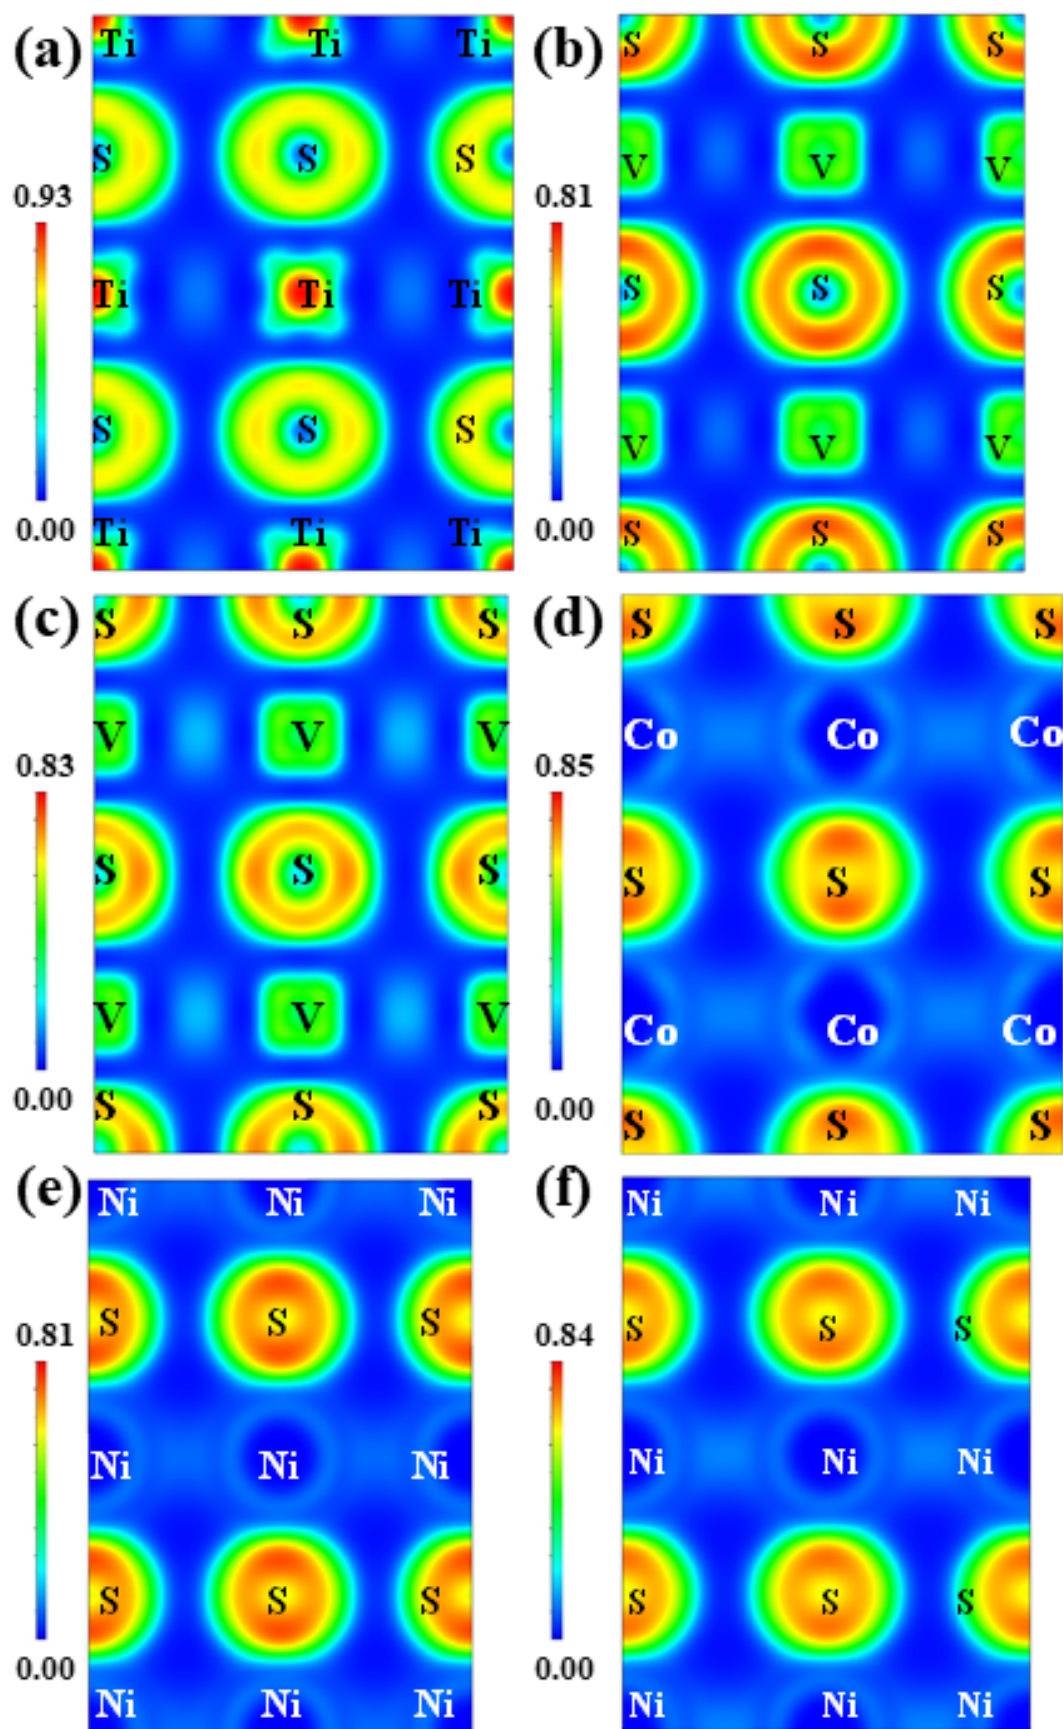

Figure S13 ELFs of (a) TiSI, (b) VSBr, (c) VSI, (d) CoSI, (e) NiSBr, and (f) NiSI on the (001) surfaces.

Table S1 Lattice parameters, bond lengths, and bond angles of the proposed structures.

| MSX   | a (Å) | b (Å) | $l_1$ (Å) | $l_2$ (Å) | $l_3$ (Å) | $\theta_1$ (°) | $\theta_2$ (°) | $\theta_3$ (°) | $(\theta_1+\theta_2)/2$ (°) |
|-------|-------|-------|-----------|-----------|-----------|----------------|----------------|----------------|-----------------------------|
| TiSBr | 3.643 | 4.978 | 2.664     | 2.494     | 2.493     | 93.888         | 86.295         | 87.885         | 90.091                      |
| TiSI  | 3.793 | 4.982 | 2.886     | 2.503     | 2.493     | 98.563         | 82.200         | 49.639         | 90.381                      |
| VSBr  | 3.537 | 5.055 | 2.573     | 2.484     | 2.428     | 91.112         | 87.140         | 54.603         | 89.126                      |
| VSI   | 3.780 | 5.029 | 2.840     | 2.401     | 2.468     | 98.744         | 79.817         | 47.943         | 89.280                      |
| MnSBr | 3.402 | 4.909 | 2.502     | 2.335     | 2.475     | 93.507         | 85.637         | 57.489         | 89.572                      |
| MnSI  | 3.898 | 4.405 | 2.751     | 2.584     | 2.209     | 97.914         | 90.215         | 50.779         | 94.064                      |
| FeSBr | 3.514 | 4.221 | 2.432     | 2.280     | 2.277     | 100.801        | 92.505         | 58.886         | 96.653                      |
| FeSI  | 3.611 | 4.247 | 2.593     | 2.320     | 2.268     | 102.211        | 88.256         | 57.194         | 95.233                      |
| CoSBr | 3.398 | 4.498 | 2.410     | 2.258     | 2.301     | 97.631         | 89.658         | 56.937         | 93.645                      |
| CoSI  | 3.551 | 4.488 | 2.584     | 2.289     | 2.299     | 101.721        | 86.809         | 54.809         | 94.265                      |
| NiSBr | 3.322 | 4.802 | 2.368     | 2.217     | 2.436     | 97.046         | 89.090         | 57.465         | 93.068                      |
| NiSI  | 3.485 | 4.752 | 2.541     | 2.252     | 2.416     | 101.386        | 86.578         | 55.242         | 93.982                      |

Table S2 Energies of FM and AFM states of MSX.

| MSX   | FM (eV)  | AFM1 (eV) | AFM2 (eV) | AFM3 (eV) | AFM4 (eV) | AFM5 (eV) | AFM6 (eV) | AFM7 (eV) | AFM8 (eV) | ground state |
|-------|----------|-----------|-----------|-----------|-----------|-----------|-----------|-----------|-----------|--------------|
| TiSI  | -111.731 | -111.793  | -111.824  | -111.751  | -103.274  | -111.805  | -111.825  | -111.825  | -111.769  | AFM6         |
| VSBr  | -109.794 | -109.749  | -109.836  | -109.723  | -109.769  | -109.780  | -109.816  | -109.838  | -109.610  | AFM7         |
| VSI   | -102.609 | -102.924  | -102.942  | -102.860  | -102.894  | -102.906  | -102.979  | -102.955  | -102.983  | AFM8         |
| CoSI  | -78.584  | -78.432   | -78.319   | -78.516   | -78.215   | -78.433   | -78.306   | -78.314   | -78.527   | FM           |
| NiSBr | -71.959  | -71.699   | -71.801   | -71.703   | -70.465   | -71.701   | -71.855   | -71.842   | -71.460   | FM           |
| NiSI  | -67.941  | -67.560   | -67.579   | -67.585   | -65.926   | -67.556   | -67.689   | -67.642   | -67.404   | FM           |

Table S3 Angular dependent MAEs of CoSI, NiSBr, and NiSI.

| MSX   | plane | 0° (meV) | 30° (meV) | 60° (meV) | 90° (meV) | 120° (meV) | 150° (meV) | 180° (meV) |
|-------|-------|----------|-----------|-----------|-----------|------------|------------|------------|
| CoSI  | xoy   | 0        | 0.287     | 0.813     | 1.005     | 0.813      | 0.287      | 0          |
|       | yoz   | 0        | 0.213     | 0.725     | 0.965     | 0.725      | 0.213      | 0          |
|       | xoz   | 1.005    | 0.954     | 0.965     | 0.965     | 0.965      | 0.954      | 1.005      |
| NiSBr | xoy   | 0        | -0.026    | -0.056    | -0.066    | -0.056     | -0.026     | 0          |
|       | yoz   | 0        | 0.049     | 0.146     | 0.195     | 0.146      | 0.049      | 0          |
|       | xoz   | -0.066   | 0.003     | 0.135     | 0.195     | 0.135      | 0.003      | -0.066     |
| NiSI  | xoy   | 0        | 0.334     | 0.884     | 1.171     | 0.884      | 0.334      | 0          |
|       | yoz   | 0        | 0.566     | 1.652     | 2.120     | 1.652      | 0.566      | 0          |
|       | xoz   | 1.171    | 1.384     | 1.858     | 2.120     | 1.858      | 1.384      | 1.171      |

Table S4 Bandgaps of semiconducting TiSI, VSBr, and VSI.

| MSX  | Bandgap (eV) |
|------|--------------|
| TiSI | 1.473        |
| VSBr | 1.459        |
| VSI  | 0.748        |
